# Supplementary material for: Construct validity of real-world digital mobility outcomes in patients after proximal femoral fracture: A cross-sectional observational study
Source: Research Square preprint supplement (doi:10.21203/rs.3.rs-7799825/v1), 2025-12-05

# Supplementary Information

**Supplementary Table S1.** Description of the 24 digital mobility outcomes (DMOs).

| DMO                                                         | Definition                                                                                                                                                                        | Unit      |
|-------------------------------------------------------------|-----------------------------------------------------------------------------------------------------------------------------------------------------------------------------------|-----------|
| <b>Walking activity</b>                                     |                                                                                                                                                                                   |           |
| <i>Amount</i>                                               |                                                                                                                                                                                   |           |
| Walking duration                                            | Weekly mean of time spent walking per day                                                                                                                                         | min/day   |
| Number of steps                                             | Weekly mean of the number of steps per day                                                                                                                                        | steps/day |
| <i>Pattern</i>                                              |                                                                                                                                                                                   |           |
| Number of WBs (n)                                           | Weekly mean of the sum of walking bouts per day                                                                                                                                   | WBs/day   |
| Number of WBs >10s                                          | Weekly mean of the sum of walking bouts per day including bouts longer than 10 seconds                                                                                            | WBs/day   |
| Number of WBs >30s                                          | Weekly mean of the sum of walking bouts per day including bouts longer than 30 seconds                                                                                            | WBs/day   |
| Number of WBs >60s                                          | Weekly mean of the sum of walking bouts per day including bouts longer than 60 seconds                                                                                            | WBs/day   |
| WB duration                                                 | Weekly mean of the daily mean of walking bout duration                                                                                                                            | s         |
| P90 WB duration                                             | Weekly mean of the daily 90th percentile of walking bout duration                                                                                                                 | s         |
| WB duration bout to bout variability                        | Weekly mean of the daily bout to bout variability of walking bout duration                                                                                                        | %         |
| <b>Gait</b>                                                 |                                                                                                                                                                                   |           |
| <i>Pace</i>                                                 |                                                                                                                                                                                   |           |
| Walking speed in shorter (10-30s) WBs                       | Weekly mean of the daily average walking speed, assessed in walking bouts between 10 and 30 seconds                                                                               | m/s       |
| Walking speed in longer (>30s) WB                           | Weekly mean of the daily average walking speed, assessed in walking bouts longer than 30 seconds                                                                                  | m/s       |
| P90 walking speed in WBs >10s                               | Weekly mean of the daily 90th percentile of the walking speed, assessed in walking bouts of more than 10 seconds                                                                  | m/s       |
| P90 walking speed in longer (>30s) WBs                      | Weekly mean of the daily 90th percentile of the walking speed, assessed in walking bouts of longer than 30 seconds                                                                | m/s       |
| Stride length in shorter (10-30s) WBs                       | Weekly mean of the daily length of two consecutive steps, assessed during walking bouts between 10 and 30 seconds                                                                 | cm        |
| Stride length in longer (>30s) WBs                          | Weekly mean of the daily average length of two consecutive steps, assessed during walking bouts longer than 30 seconds                                                            | cm        |
| <i>Rhythm</i>                                               |                                                                                                                                                                                   |           |
| Cadence in all WBs                                          | Weekly mean of the daily average of the steps frequency during a period of time (minutes), calculated in all walking bouts                                                        | steps/min |
| Cadence in longer (>30s) WBs                                | Weekly mean of the daily average of the steps frequency during a period of time (minutes), calculated in walking bouts longer than 30 seconds                                     | steps/min |
| P90 cadence in longer (>30s) WBs                            | Weekly mean of the daily 90th percentile of the steps frequency during a period of time (minutes), calculated in walking bouts longer than 30 seconds                             | steps/min |
| Stride duration in all WBs                                  | Weekly mean of the daily average of the time elapsed between the initial contacts of two consecutive footfalls of the same foot, assessed in all walking bouts                    | s         |
| Stride duration in longer (>30s) WBs                        | Weekly mean of the daily average of the time elapsed between the initial contacts of two consecutive footfalls of the same foot, assessed in walking bouts longer than 30 seconds | s         |
| <i>Bout-to-bout variability</i>                             |                                                                                                                                                                                   |           |
| Walking speed bout-to-bout variability in longer (>30s) WBs | Weekly mean of the daily bout-to-bout variability of walking speed, assessed in walking bouts longer than 30 seconds                                                              | %         |
| Stride length bout-to-bout variability in longer (>30s) WBs | Weekly mean of the daily bout-to-bout variability of stride length, assessed in walking bouts longer than 30 seconds                                                              | %         |
| Cadence bout-to-bout variability                            | Weekly mean of the daily bout-to-bout variability of cadence, assessed in all walking bouts                                                                                       | %         |
| Stride duration bout-to-bout variability                    | Weekly mean of the daily bout-to-bout variability of stride duration, assessed in all walking bouts                                                                               | %         |

**Supplementary Table S2.** Expected correlation coefficient ranges between DMOs and related constructs in **non-acute** patients, derived from previous research, pilot testing, and expert consultation.

| DMO                                                             | Convergent   |              |               |                 |              |              |              |
|-----------------------------------------------------------------|--------------|--------------|---------------|-----------------|--------------|--------------|--------------|
|                                                                 | TUG          | SPPB total   | 4m gait speed | 6MinWT Distance | LLFDI-FC     | Short FES-I  | FACIT-F      |
| <b>Walking activity</b>                                         |              |              |               |                 |              |              |              |
| <i>Amount</i>                                                   |              |              |               |                 |              |              |              |
| Walking duration (min/day)                                      | -0.6 to -0.9 | 0.6 to 0.9   | 0.6 to 0.9    | 0.6 to 0.9      | 0.4 to 0.6   | -0.4 to -0.6 | 0.3 to 0.4   |
| Number of steps (steps/day)                                     | -0.6 to -0.9 | 0.6 to 0.9   | 0.6 to 0.9    | 0.6 to 0.9      | 0.4 to 0.6   | -0.4 to -0.6 | 0.3 to 0.4   |
| <i>Pattern</i>                                                  |              |              |               |                 |              |              |              |
| Number of WBs (n)                                               | -0.6 to -0.9 | 0.6 to 0.9   | 0.6 to 0.9    | 0.6 to 0.9      | 0.4 to 0.6   | -0.4 to -0.6 | 0.3 to 0.4   |
| Number of WBs >10s (n)                                          | -0.6 to -0.9 | 0.6 to 0.9   | 0.6 to 0.9    | 0.6 to 0.9      | 0.4 to 0.6   | -0.4 to -0.6 | 0.3 to 0.4   |
| Number of WBs >30s (n)                                          | -0.6 to -0.9 | 0.6 to 0.9   | 0.6 to 0.9    | 0.6 to 0.9      | 0.4 to 0.6   | -0.4 to -0.6 | 0.3 to 0.4   |
| Number of WBs >60s (n)                                          | -0.4 to -0.6 | 0.4 to 0.6   | 0.4 to 0.6    | 0.6 to 0.9      | 0.4 to 0.6   | -0.4 to -0.6 | 0.3 to 0.4   |
| WB duration (s)                                                 | -0.4 to -0.6 | 0.4 to 0.6   | 0.4 to 0.6    | 0.4 to 0.6      | 0.4 to 0.6   | -0.4 to -0.6 | 0.3 to 0.4   |
| P90 WB duration (s)                                             | -0.4 to -0.6 | 0.4 to 0.6   | 0.4 to 0.6    | 0.6 to 0.9      | 0.4 to 0.6   | -0.4 to -0.6 | 0.3 to 0.4   |
| WB duration bout to bout variability (%)                        | -0.4 to -0.6 | 0.4 to 0.6   | 0.4 to 0.6    | 0.4 to 0.6      | 0.4 to 0.6   | -0.4 to -0.6 | 0.3 to 0.4   |
| <b>Gait</b>                                                     |              |              |               |                 |              |              |              |
| <i>Pace</i>                                                     |              |              |               |                 |              |              |              |
| Walking speed in shorter (10-30s) WBs (m/s)                     | -0.4 to -0.6 | 0.4 to 0.6   | 0.4 to 0.6    | 0.4 to 0.6      | 0.4 to 0.6   | -0.3 to -0.4 | 0.3 to 0.4   |
| Walking speed in longer (>30s) WBs (m/s)                        | -0.4 to -0.6 | 0.4 to 0.6   | 0.4 to 0.6    | 0.4 to 0.6      | 0.4 to 0.6   | -0.3 to -0.4 | 0.3 to 0.4   |
| P90 walking speed in WBs >10s (m/s)                             | -0.6 to -0.9 | 0.6 to 0.9   | 0.6 to 0.9    | 0.6 to 0.9      | 0.4 to 0.6   | -0.4 to -0.6 | 0.3 to 0.4   |
| P90 walking speed in longer (>30s) WBs (m/s)                    | -0.6 to -0.9 | 0.6 to 0.9   | 0.6 to 0.9    | 0.6 to 0.9      | 0.4 to 0.6   | -0.4 to -0.6 | 0.3 to 0.4   |
| Stride length in shorter (10-30s) WBs (cm)                      | -0.4 to -0.6 | 0.4 to 0.6   | 0.4 to 0.6    | 0.4 to 0.6      | 0.4 to 0.6   | -0.3 to -0.4 | 0.3 to 0.4   |
| Stride length in longer (>30s) WBs (cm)                         | -0.4 to -0.6 | 0.4 to 0.6   | 0.4 to 0.6    | 0.4 to 0.6      | 0.4 to 0.6   | -0.3 to -0.4 | 0.3 to 0.4   |
| <i>Rhythm</i>                                                   |              |              |               |                 |              |              |              |
| Cadence in all WBs (steps/min)                                  | -0.4 to -0.6 | 0.4 to 0.6   | 0.4 to 0.6    | 0.4 to 0.6      | 0.3 to 0.4   | -0.3 to -0.4 | 0.3 to 0.4   |
| Cadence in longer (>30s) WBs (steps/min)                        | -0.4 to -0.6 | 0.4 to 0.6   | 0.4 to 0.6    | 0.4 to 0.6      | 0.3 to 0.4   | -0.3 to -0.4 | 0.3 to 0.4   |
| P90 cadence in longer (>30s) WBs (steps/min)                    | -0.4 to -0.6 | 0.4 to 0.6   | 0.4 to 0.6    | 0.4 to 0.6      | 0.3 to 0.4   | -0.3 to -0.4 | 0.3 to 0.4   |
| Stride duration in all WBs (s)                                  | 0.4 to 0.6   | -0.4 to -0.6 | -0.4 to -0.6  | -0.4 to -0.6    | -0.3 to -0.4 | 0.3 to 0.4   | -0.3 to -0.4 |
| Stride duration in longer (>30s) WBs (s)                        | 0.4 to 0.6   | -0.4 to -0.6 | -0.4 to -0.6  | -0.4 to -0.6    | -0.3 to -0.4 | 0.3 to 0.4   | -0.3 to -0.4 |
| <i>Bout-to-bout variability</i>                                 |              |              |               |                 |              |              |              |
| Walking speed bout-to-bout variability in longer (>30s) WBs (%) | -0.4 to -0.6 | 0.4 to 0.6   | 0.4 to 0.6    | 0.4 to 0.6      | 0.3 to 0.4   | -0.3 to -0.4 | 0.3 to 0.4   |
| Stride length bout-to-bout variability in longer (>30s) WBs (%) | -0.4 to -0.6 | 0.4 to 0.6   | 0.4 to 0.6    | 0.4 to 0.6      | 0.3 to 0.4   | -0.3 to -0.4 | 0.3 to 0.4   |
| Cadence bout-to-bout variability (%)                            | -0.4 to -0.6 | 0.4 to 0.6   | 0.4 to 0.6    | 0.4 to 0.6      | 0.3 to 0.4   | -0.3 to -0.4 | 0.3 to 0.4   |
| Stride duration bout-to-bout variability (%)                    | -0.4 to -0.6 | 0.4 to 0.6   | 0.4 to 0.6    | 0.4 to 0.6      | 0.3 to 0.4   | -0.3 to -0.4 | 0.3 to 0.4   |

DMO Digital Mobility Outcome; TUG Timed Up and Go test; SPPB Short Physical Performance Battery; 4m gait speed Gait speed from the SPPB supervised 4-meter walk test; 6MinWT 6-Minute Walking Test; LLFDI-FC Late Life Function and Disability Instrument – Functional Component; Short FES-I Short Falls Efficacy Scale International; FACIT-F Functional Assessment of Chronic Illness Therapy Fatigue Scale; WBs Walking Bouts.

**Supplementary Table S3.** Expected correlation coefficient ranges between DMOs and related constructs in **acute** patients, derived from previous research, pilot testing, and expert consultation.

| DMO                                                             | Convergent   |               |              |              |
|-----------------------------------------------------------------|--------------|---------------|--------------|--------------|
|                                                                 | SPPB total   | 4m gait speed | Short FES-I  | FACIT-F      |
| <b>Walking activity</b>                                         |              |               |              |              |
| <i>Amount</i>                                                   |              |               |              |              |
| Walking duration (min/day)                                      | 0.3 to 0.4   | 0.3 to 0.4    | -0.3 to -0.4 | 0.3 to 0.4   |
| Number of steps (steps/day)                                     | 0.3 to 0.4   | 0.3 to 0.4    | -0.3 to -0.4 | 0.3 to 0.4   |
| <i>Pattern</i>                                                  |              |               |              |              |
| Number of WBs (n)                                               | 0.3 to 0.4   | 0.3 to 0.4    | -0.3 to -0.4 | 0.3 to 0.4   |
| Number of WBs >10s (n)                                          | 0.3 to 0.4   | 0.3 to 0.4    | -0.3 to -0.4 | 0.3 to 0.4   |
| Number of WBs >30s (n)                                          | 0.3 to 0.4   | 0.3 to 0.4    | -0.3 to -0.4 | 0.3 to 0.4   |
| Number of WBs >60s (n)                                          | 0.3 to 0.4   | 0.3 to 0.4    | -0.3 to -0.4 | 0.3 to 0.4   |
| WB duration (s)                                                 | 0.3 to 0.4   | 0.3 to 0.4    | -0.3 to -0.4 | 0.3 to 0.4   |
| P90 WB duration (s)                                             | 0.3 to 0.4   | 0.3 to 0.4    | -0.3 to -0.4 | 0.3 to 0.4   |
| WB duration bout to bout variability (%)                        | 0.3 to 0.4   | 0.3 to 0.4    | -0.3 to -0.4 | 0.3 to 0.4   |
| <b>Gait</b>                                                     |              |               |              |              |
| <i>Pace</i>                                                     |              |               |              |              |
| Walking speed in shorter (10-30s) WBs (m/s)                     | 0.3 to 0.4   | 0.3 to 0.4    | -0.3 to -0.4 | 0.3 to 0.4   |
| Walking speed in longer (>30s) WBs (m/s)                        | 0.3 to 0.4   | 0.3 to 0.4    | -0.3 to -0.4 | 0.3 to 0.4   |
| P90 walking speed in WBs >10s (m/s)                             | 0.3 to 0.4   | 0.3 to 0.4    | -0.3 to -0.4 | 0.3 to 0.4   |
| P90 walking speed in longer (>30s) WBs (m/s)                    | 0.3 to 0.4   | 0.3 to 0.4    | -0.3 to -0.4 | 0.3 to 0.4   |
| Stride length in shorter (10-30s) WBs (cm)                      | 0.3 to 0.4   | 0.3 to 0.4    | -0.3 to -0.4 | 0.3 to 0.4   |
| Stride length in longer (>30s) WBs (cm)                         | 0.3 to 0.4   | 0.3 to 0.4    | -0.3 to -0.4 | 0.3 to 0.4   |
| <i>Rhythm</i>                                                   |              |               |              |              |
| Cadence in all WBs (steps/min)                                  | 0.3 to 0.4   | 0.3 to 0.4    | -0.3 to -0.4 | 0.3 to 0.4   |
| Cadence in longer (>30s) WBs (steps/min)                        | 0.3 to 0.4   | 0.3 to 0.4    | -0.3 to -0.4 | 0.3 to 0.4   |
| P90 cadence in longer (>30s) WBs (steps/min)                    | 0.3 to 0.4   | 0.3 to 0.4    | -0.3 to -0.4 | 0.3 to 0.4   |
| Stride duration in all WBs (s)                                  | -0.3 to -0.4 | -0.3 to -0.4  | 0.3 to 0.4   | -0.3 to -0.4 |
| Stride duration in longer (>30s) WBs (s)                        | -0.3 to -0.4 | -0.3 to -0.4  | 0.3 to 0.4   | -0.3 to -0.4 |
| <i>Bout-to-bout variability</i>                                 |              |               |              |              |
| Walking speed bout-to-bout variability in longer (>30s) WBs (%) | 0.3 to 0.4   | 0.3 to 0.4    | -0.3 to -0.4 | 0.3 to 0.4   |
| Stride length bout-to-bout variability in longer (>30s) WBs (%) | 0.3 to 0.4   | 0.3 to 0.4    | -0.3 to -0.4 | 0.3 to 0.4   |
| Cadence bout-to-bout variability (%)                            | 0.3 to 0.4   | 0.3 to 0.4    | -0.3 to -0.4 | 0.3 to 0.4   |
| Stride duration bout-to-bout variability (%)                    | 0.3 to 0.4   | 0.3 to 0.4    | -0.3 to -0.4 | 0.3 to 0.4   |

DMO Digital Mobility Outcome; SPPB Short Physical Performance Battery; 4m gait speed Gait speed from the SPPB supervised 4-meter walk test; Short FES-I Short Falls Efficacy Scale International; FACIT-F Functional Assessment of Chronic Illness Therapy Fatigue Scale; WBs Walking Bouts.

**Supplementary Table S4.** Comparison of sociodemographic and clinical characteristics between included and excluded participants after PFF surgery.

|                                                           | Excluded<br>n = 62 (11%) | Included<br>n = 505 (89%) | p-value |
|-----------------------------------------------------------|--------------------------|---------------------------|---------|
| <b>Sociodemographic characteristics</b>                   |                          |                           |         |
| Age, mean (SD)                                            | 77.2 (10.6)              | 77.6 (9.4)                | 0.717   |
| Gender, female, n (%)                                     | 42 (69%)                 | 333 (66%)                 | 0.662   |
| Marital status, married, n (%)                            | 26 (43%)                 | 246 (49%)                 | 0.657   |
| Education less than high school (<10 yrs) / others, n (%) | 34 (55%)                 | 320 (63%)                 | 0.663   |
| Recruitment site, n (%)                                   |                          |                           | <0.001  |
| <i>Montpellier</i>                                        | 23 (37%)                 | 39 (8%)                   |         |
| <i>Trondheim / Oslo</i>                                   | 24 (39%)                 | 238 (47%)                 |         |
| <i>Stuttgart / Heidelberg</i>                             | 15 (25%)                 | 228 (45%)                 |         |
| Fracture Type, n (%)                                      |                          |                           | 1       |
| <i>Femoral neck fracture</i>                              | 42 (69%)                 | 348 (69%)                 |         |
| <i>Extracapsular fracture</i>                             | 19 (31%)                 | 157 (31%)                 |         |
| Days since surgery, median (p25-p75)                      | 62 (5 - 201)             | 60 (23 - 140)             | 0.768   |
| Functional Comorbidity Index [0-18], mean (SD)            | 3.3 (3.0)                | 3.3 (2.1)                 | 0.411   |
| Walking Aids, n (%)                                       |                          |                           | 0.002   |
| <i>Indoor</i>                                             | 17 (39%)                 | 253 (62%)                 | 0.003   |
| <i>Outdoor</i>                                            | 28 (64%)                 | 301 (74%)                 | 0.144   |
| Recovery Phase, n (%)                                     |                          |                           | 0.002   |
| <i>Acute</i>                                              | 18 (29%)                 | 100 (20%)                 |         |
| <i>Post Acute</i>                                         | 10 (16%)                 | 117 (23%)                 |         |
| <i>Extended Recovery</i>                                  | 13 (21%)                 | 201 (40%)                 |         |
| <i>Long Term Recovery</i>                                 | 21 (34%)                 | 87 (17%)                  |         |
| <b>Clinical characteristics</b>                           |                          |                           |         |
| TUG in s, mean (SD)                                       | 23.7 (17.8)              | 19.8 (12.3)               | 0.441   |
| SPPB                                                      |                          |                           |         |
| <i>Total score [0-12], mean (SD)</i>                      | 5.6 (3.7)                | 6.2 (3.1)                 | 0.057   |
| <i>Gait speed (m/s), mean (SD)</i>                        | 0.70 (0.50)              | 0.70 (0.40)               | 0.319   |
| 6MinWT Distance (m), mean (SD)                            | 278.4 (149.9)            | 283.6 (125.9)             | 0.777   |
| LLFDI-FC [0-100], median (p25-p75)                        | 56 (42 - 62)             | 49 (42 - 59)              | 0.167   |
| Short FES-I [7-28], median (p25-p75)                      | 8 (7 - 14)               | 10 (7 - 14)               | 0.257   |
| FACIT-F [0-52], median (p25-p75)                          | 41 (32 - 47)             | 40 (31 - 45)              | 0.468   |
| Hearing Impairment [2-8], mean (SD)                       | 3.2 (1.4)                | 2.9 (1.2)                 | 0.043   |
| Arterial hypertension [>140 mm Hg systolic BP], n (%)     | 21 (34%)                 | 185 (37%)                 | 0.688   |

*Fracture Type*: 1 participant with missing data; *Walking Aids* Acute patients were not included in the analysis as the pre-fracture walking aid usage was assessed. *TUG* Timed Up and Go test; *SPPB* Short Physical Performance Battery; *4m gait speed* Gait speed from the SPPB supervised 4-meter walk test. *6MinWT* 6-Minute Walking Test; *LLFDI-FC* Late Life Function and Disability Instrument – Functional Component; *Short FES-I* Short Falls Efficacy Scale International; *FACIT-F* Functional Assessment of Chronic Illness Therapy Fatigue Scale; *BP* Blood Pressure; *TUG*, 5-time chair rise as part of *SPPB*, *6MinWT* and *LLFDI* Not performed in acute patients.

**Supplementary Table S5.** Distribution and convergent and divergent validity (correlation coefficients with corresponding 95% CIs) of DMOs in 100 **acute** patients assessed ≤14 days after PFF surgery. Coefficients in bold represent those that matched or exceeded expected values, while coefficients in non-bold represent those that did not match the expected values. Divergent validity coefficients are shown in grey as the sample size was too small.

| DMO                                                             | Mean (SD) or median (p25 - p75) | Convergent               |                          |                      |                     | Divergent           |                      |
|-----------------------------------------------------------------|---------------------------------|--------------------------|--------------------------|----------------------|---------------------|---------------------|----------------------|
|                                                                 |                                 | SPPB total               | 4m gait speed            | Short FES-I          | FACIT-F             | Hearing Impairment  | Systolic BP          |
| <b>Walking activity</b>                                         |                                 |                          |                          |                      |                     |                     |                      |
| <i>Amount</i>                                                   |                                 |                          |                          |                      |                     |                     |                      |
| Walking duration (min/day)                                      | 7 (3 - 14)                      | <b>0.39 (0.20, 0.57)</b> | <b>0.39 (0.22, 0.55)</b> | -0.08 (-0.27, 0.13)  | 0.26 (0.07, 0.44)   | -0.02 (-0.25, 0.18) | 0.10 (-0.12, 0.32)   |
| Number of steps (steps/day)                                     | 519 (241-1069)                  | <b>0.40 (0.18, 0.57)</b> | <b>0.39 (0.20, 0.54)</b> | -0.08 (-0.29, 0.10)  | 0.27 (0.08, 0.43)   | -0.02 (-0.24, 0.2)  | 0.11 (-0.12, 0.32)   |
| <i>Pattern</i>                                                  |                                 |                          |                          |                      |                     |                     |                      |
| Number of WBs (n)                                               | 57 (59)                         | <b>0.41 (0.21, 0.59)</b> | <b>0.43 (0.26, 0.58)</b> | -0.14 (-0.31, 0.07)  | 0.28 (0.08, 0.44)   | -0.06 (-0.26, 0.16) | 0.11 (-0.13, 0.35)   |
| Number of WBs >10s (n)                                          | 12 (6 - 26)                     | <b>0.36 (0.16, 0.54)</b> | <b>0.35 (0.16, 0.50)</b> | -0.06 (-0.26, 0.15)  | 0.25 (0.04, 0.41)   | -0.02 (-0.21, 0.20) | 0.08 (-0.16, 0.31)   |
| Number of WBs >30s (n)                                          | 1 (0 - 4)                       | 0.28 (0.04, 0.46)        | 0.24 (0.05, 0.43)        | 0.06 (-0.15, 0.28)   | 0.12 (-0.07, 0.31)  | 0.03 (-0.18, 0.24)  | 0.11 (-0.14, 0.32)   |
| Number of WBs >60s (n)                                          | 0 (0 - 1)                       | 0.24 (0.03, 0.43)        | 0.20 (-0.01, 0.39)       | 0.04 (-0.20, 0.27)   | 0.09 (-0.11, 0.27)  | 0.01 (-0.19, 0.23)  | 0.11 (-0.17, 0.30)   |
| WB duration (s)                                                 | 7.4 (6.6 - 8.3)                 | 0.04 (-0.15, 0.25)       | 0.01 (-0.18, 0.22)       | 0.26 (0.05, 0.47)    | -0.02 (-0.21, 0.21) | 0.13 (-0.05, 0.32)  | 0.00 (-0.21, 0.21)   |
| P90 WB duration (s)                                             | 16.8 (12.7 - 22.8)              | 0.13 (-0.09, 0.31)       | 0.14 (-0.05, 0.32)       | 0.17 (-0.06, 0.38)   | 0.03 (-0.15, 0.21)  | 0.10 (-0.11, 0.30)  | 0.03 (-0.18, 0.25)   |
| WB duration bout to bout variability (%)                        | 67 (53 - 81)                    | 0.24 (0.05, 0.42)        | 0.22 (0.04, 0.40)        | 0.02 (-0.21, 0.22)   | 0.11 (-0.07, 0.28)  | 0.00 (-0.19, 0.20)  | -0.02 (-0.22, 0.21)  |
| <b>Gait</b>                                                     |                                 |                          |                          |                      |                     |                     |                      |
| <i>Pace</i>                                                     |                                 |                          |                          |                      |                     |                     |                      |
| Walking speed in shorter (10-30s) WBs (m/s)                     | 0.55 (0.08)                     | 0.07 (-0.16, 0.26)       | 0.07 (-0.13, 0.29)       | -0.13 (-0.33, 0.06)  | 0.10 (-0.11, 0.31)  | 0.06 (-0.14, 0.27)  | -0.18 (-0.36, 0.05)  |
| Walking speed in longer (>30s) WBs (m/s)                        | 0.56 (0.09)                     | <b>0.31 (0.07, 0.52)</b> | <b>0.30 (0.08, 0.49)</b> | -0.28 (-0.50, -0.05) | 0.19 (-0.04, 0.41)  | -0.04 (-0.25, 0.18) | -0.03 (-0.28, 0.21)  |
| P90 walking speed in WBs >10s (m/s)                             | 0.62 (0.10)                     | 0.15 (-0.05, 0.37)       | 0.13 (-0.09, 0.32)       | -0.13 (-0.31, 0.07)  | 0.13 (-0.07, 0.31)  | 0.07 (-0.12, 0.27)  | -0.17 (-0.38, 0.06)  |
| P90 walking speed in longer (>30s) WBs (m/s)                    | 0.61 (0.10)                     | 0.26 (0.03, 0.48)        | 0.29 (0.05, 0.48)        | -0.24 (-0.44, -0.01) | 0.13 (-0.10, 0.34)  | -0.03 (-0.25, 0.19) | 0.02 (-0.22, 0.27)   |
| Stride length in shorter (10-30s) WBs (cm)                      | 83 (11)                         | 0.18 (-0.06, 0.37)       | 0.17 (-0.04, 0.37)       | -0.12 (-0.33, 0.10)  | 0.13 (-0.07, 0.31)  | 0.01 (-0.19, 0.20)  | -0.30 (-0.52, -0.06) |
| Stride length in longer (>30s) WBs (cm)                         | 86 (12)                         | <b>0.33 (0.11, 0.52)</b> | <b>0.41 (0.21, 0.59)</b> | -0.29 (-0.50, -0.06) | 0.23 (0.02, 0.46)   | -0.05 (-0.26, 0.18) | -0.08 (-0.30, 0.18)  |
| <i>Rhythm</i>                                                   |                                 |                          |                          |                      |                     |                     |                      |
| Cadence in all WBs (steps/min)                                  | 81 (5)                          | -0.13 (-0.32, 0.10)      | -0.08 (-0.28, 0.14)      | -0.12 (-0.36, 0.10)  | -0.01 (-0.21, 0.18) | 0.11 (-0.11, 0.30)  | 0.11 (-0.10, 0.33)   |
| Cadence in longer (>30s) WBs (steps/min)                        | 78 (7)                          | 0.07 (-0.16, 0.30)       | 0.00 (-0.23, 0.24)       | -0.14 (-0.37, 0.10)  | 0.04 (-0.18, 0.26)  | 0.03 (-0.19, 0.27)  | 0.16 (-0.08, 0.36)   |
| P90 cadence in longer (>30s) WBs (steps/min)                    | 82 (8)                          | 0.12 (-0.12, 0.33)       | 0.08 (-0.15, 0.31)       | -0.09 (-0.33, 0.15)  | 0.02 (-0.18, 0.23)  | 0.04 (-0.20, 0.26)  | 0.17 (-0.05, 0.39)   |
| Stride duration in all WBs (s)                                  | 1.37 (0.12)                     | 0.10 (-0.07, 0.30)       | 0.03 (-0.15, 0.23)       | 0.12 (-0.08, 0.33)   | 0.05 (-0.18, 0.25)  | -0.04 (-0.24, 0.16) | 0.02 (-0.20, 0.24)   |
| Stride duration in longer (>30s) WBs (s)                        | 1.39 (0.20)                     | -0.01 (-0.22, 0.23)      | -0.04 (-0.26, 0.21)      | 0.17 (-0.09, 0.40)   | 0.05 (-0.19, 0.29)  | 0.07 (-0.14, 0.30)  | 0.04 (-0.18, 0.30)   |
| <i>Bout-to-bout variability</i>                                 |                                 |                          |                          |                      |                     |                     |                      |
| Walking speed bout-to-bout variability in longer (>30s) WBs (%) | 11 (6)                          | -0.05 (-0.28, 0.20)      | -0.08 (-0.35, 0.18)      | -0.01 (-0.26, 0.25)  | -0.14 (-0.37, 0.09) | 0.16 (-0.07, 0.38)  | 0.25 (-0.01, 0.48)   |
| Stride length bout-to-bout variability in longer (>30s) WBs (%) | 9 (6)                           | 0.02 (-0.22, 0.26)       | -0.09 (-0.32, 0.16)      | 0.05 (-0.18, 0.29)   | 0.05 (-0.19, 0.31)  | 0.09 (-0.12, 0.31)  | 0.14 (-0.09, 0.37)   |
| Cadence bout-to-bout variability (%)                            | 12 (2)                          | -0.02 (-0.21, 0.19)      | 0.04 (-0.16, 0.23)       | -0.02 (-0.22, 0.18)  | -0.09 (-0.28, 0.13) | -0.01 (-0.20, 0.20) | -0.36 (-0.51, -0.17) |
| Stride duration bout-to-bout variability (%)                    | 20 (3)                          | 0.10 (-0.10, 0.29)       | -0.09 (-0.28, 0.12)      | 0.00 (-0.22, 0.20)   | -0.19 (-0.36, 0.01) | -0.05 (-0.24, 0.15) | -0.20 (-0.42, 0.01)  |

DMO Digital Mobility Outcome; SPPB Short Physical Performance Battery; 4m gait speed Gait speed from the SPPB supervised 4-meter walk test; Short FES-I Short Falls Efficacy Scale International; FACIT-F Functional Assessment of Chronic Illness Therapy Fatigue Scale; BP Blood Pressure; WBs Walking Bouts.

Number of acute participants missing DMO values: Walking speed bout to bout variability in longer (>30s) WBs and Stride length bout to bout variability in longer (>30s) WBs: 27 missing values. Walking speed in longer (>30s) WBs, Maximum walking speed in longer (>30s) WBs, Stride length in longer (>30s) WBs, Cadence in longer (>30s) WBs, Maximum cadence in longer (>30s) WBs, and Stride duration in longer (>30s) WBs: 18 missing values.

**Supplementary Fig. S6.** Known groups validity of all 24 DMOs between the four recovery groups after a PFF. This was partly published previously [1].

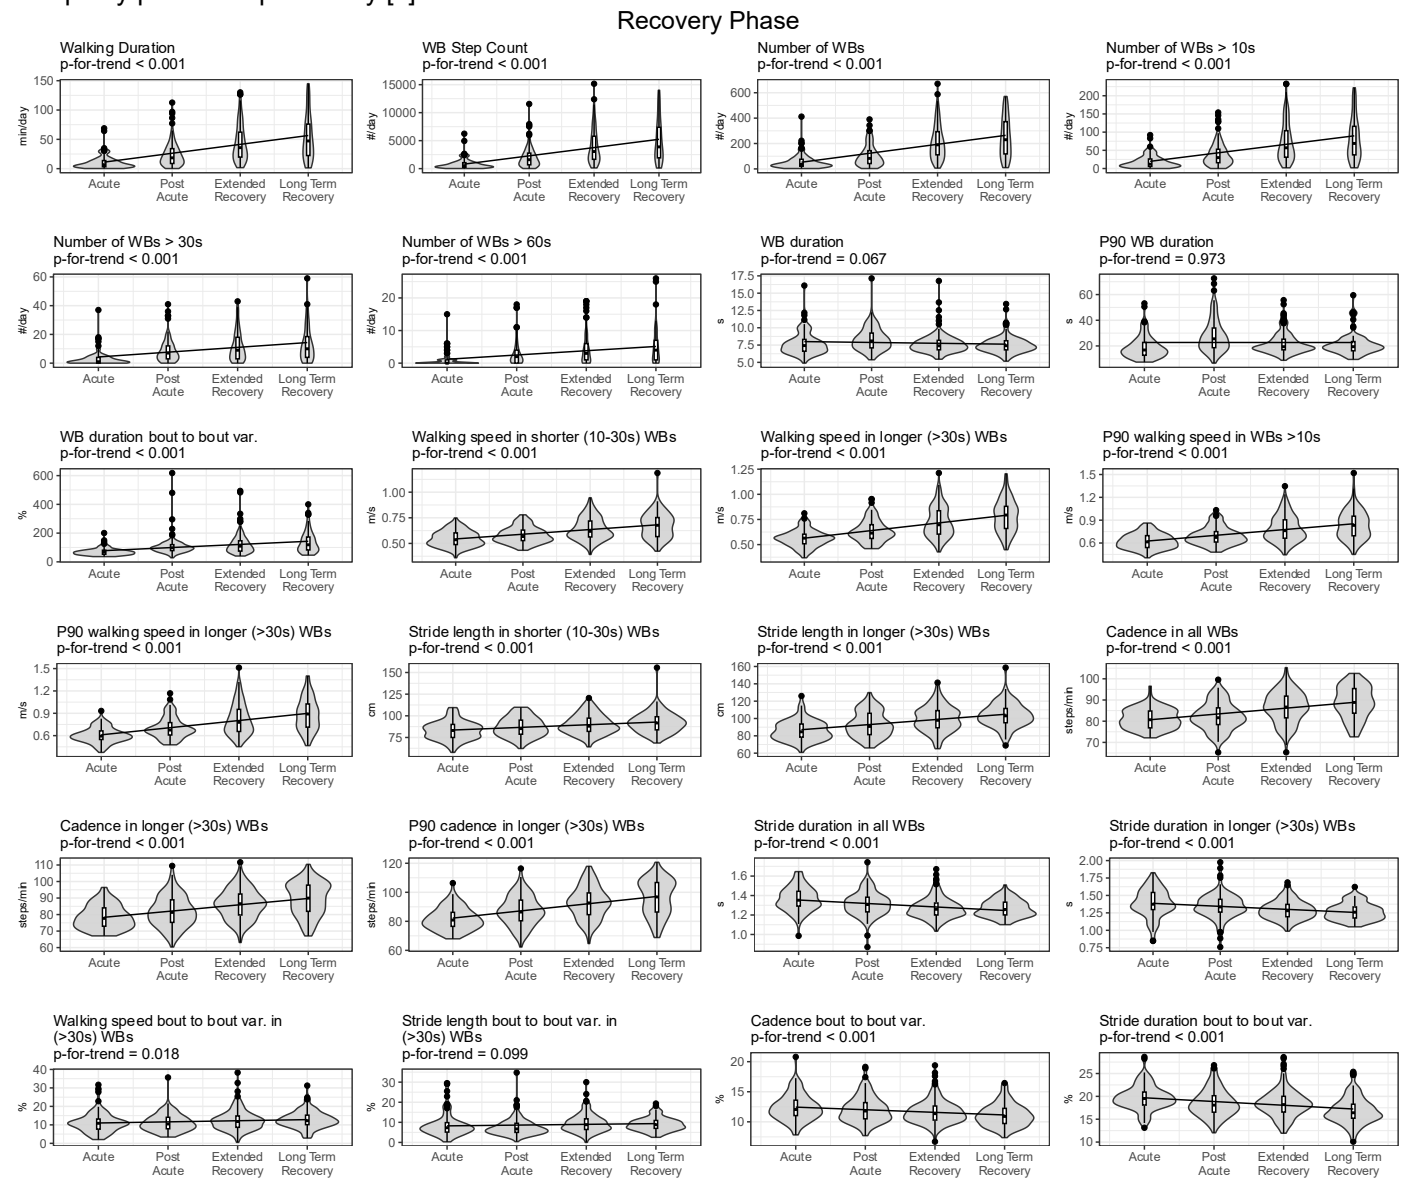

Supplement: Supplementary file 1 [file d730b64968078480f043737e.pdf]
